# Supplementary material
Source: publisher site journal article supplement (https://www.dovepress.com/article/550242)
Supplement: Supplementary file 1 [file EDITS%20V1%20appendices%20fig%201.pdf]

## APPENDIX 1: QUESTIONS FROM QUESTIONNAIRE USED IN THIS PAPER

1. Now think of 10 pregnant sex workers. Of these 10 pregnant sex workers, how many get antenatal care?

\_\_\_\_\_

2. What problems do sex workers face in getting antenatal care? Check responses:

\_\_\_\_\_ lack of money \_\_\_\_\_ lack of time \_\_\_\_\_ do not know to get it

\_\_\_\_\_ not allowed by madam or other person \_\_\_\_\_ think they do not need it

\_\_\_\_\_ attitude of health care workers to SW

\_\_\_\_\_ clinics not convenient or open when convenient for sex workers

\_\_\_\_\_ other (specify) \_\_\_\_\_

4(a) Of 10 pregnant sex workers, how many drink alcohol? \_\_\_\_\_

4(b) Of 10 pregnant sex workers, how many use drugs? \_\_\_\_\_

4(c) What are the names of these drugs? \_\_\_\_\_

3. Do health care workers treat pregnant sex workers differently than other pregnant women?

Record responses of each \_\_\_\_\_ no \_\_\_\_\_ yes \_\_\_\_\_ some \_\_\_\_\_ DNK (do not know)

For those who said “yes” ask “How do they treat pregnant sex workers differently than other pregnant women?” Record responses:

4. For pregnant sex workers who do not have an abortion, up to what month or day do most pregnant sex workers continue to work before they give birth?

Record responses: \_\_\_\_\_ DNK \_\_\_\_\_

Now we will discuss when sex workers go into labour and give birth.

5. Where do most sex workers in this community give birth?

\_\_\_\_\_ govt or public hospitals or clinics \_\_\_\_\_ private clinics \_\_\_\_\_ home \_\_\_\_\_ DNK \_\_\_\_\_

other (specify) \_\_\_\_\_

- a. [For those who said govt or public hospitals or clinics, ask] “What is the name of this hospital or clinic?”

Record responses: \_\_\_\_\_

6. After giving birth, when do most sex workers go back to work?

\_\_\_\_\_ days \_\_\_\_\_ weeks \_\_\_\_\_ month \_\_\_\_\_ DNK \_\_\_\_\_

other responses (specify) \_\_\_\_\_

7. Of 10 sex workers in this community, how many are mothers?

Record responses: \_\_\_\_\_ DNK \_\_\_\_\_

8. For sex workers who are mothers, how many children do they have?

Record responses: \_\_\_\_\_ DNK \_\_\_\_\_

9. Sometimes after giving birth some mothers who are sex workers and other mothers are sad or depressed? (Use local term or description.)

- a. Out to 10 sex workers who have young babies, how many do you think feel sad or depressed?

Record responses: \_\_\_\_\_ DNK \_\_\_\_\_

10. What can NGOs do to help children of sex workers and their mothers in this community?
